# Supplementary material
Source: publisher site journal article supplement (https://www.degruyterbrill.com/publication/isbn/9783110376265/downloadAsset/9783110376265_List-of-Figures-and-Tables.pdf)

# **Einführung in die Volkswirtschaftslehre, Mikroökonomie und Wettbewerbspolitik**

Lothar Wildmann

ISBN: 978-3-11-037361-5

© 2014 Oldenbourg Wissenschaftsverlag GmbH, München

**Abbildungsübersicht / List of Figures**  
**Tabellenübersicht / List of Tables**

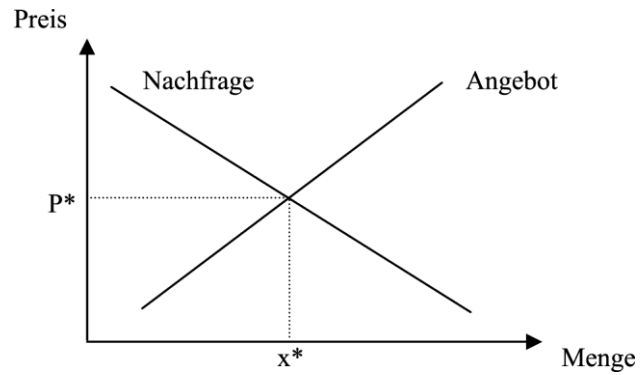

**Abbildung 1.1:** Gütermarkt.

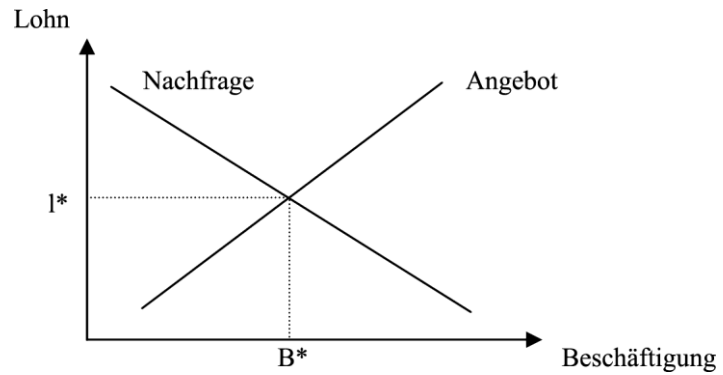

**Abbildung 1.2:** Arbeitsmarkt.

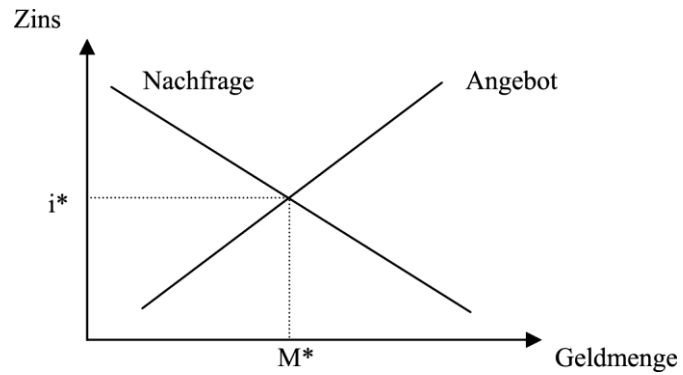

**Abbildung 1.3:** Geldmarkt.

**Gütermarkt:** $A$  = Angebot $N$  = Nachfrage $p$  = Preis $x$  = Menge $p^*$  = Markt- oder Gleichgewichtspreis $x^*$  = Gleichgewichtsmenge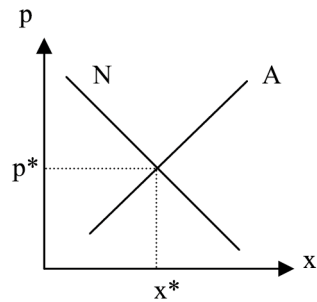**Abbildung 1.4:** Gütermarktmodell.

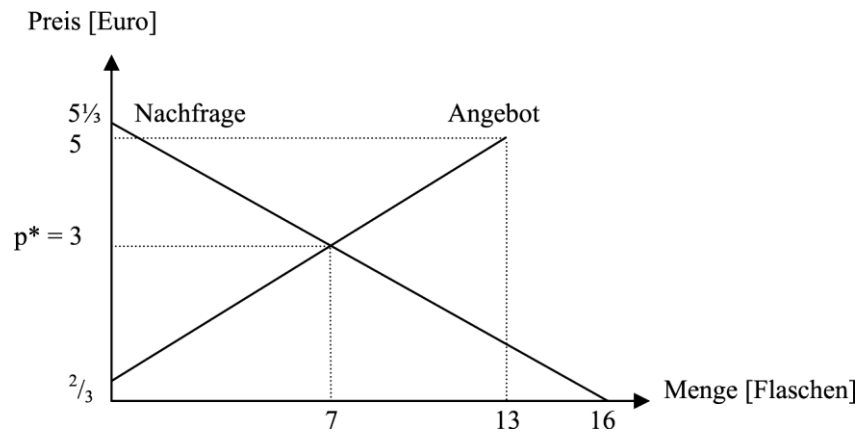

**Abbildung 1.5:** Aggregierte Angebots- und Nachfragefunktion.

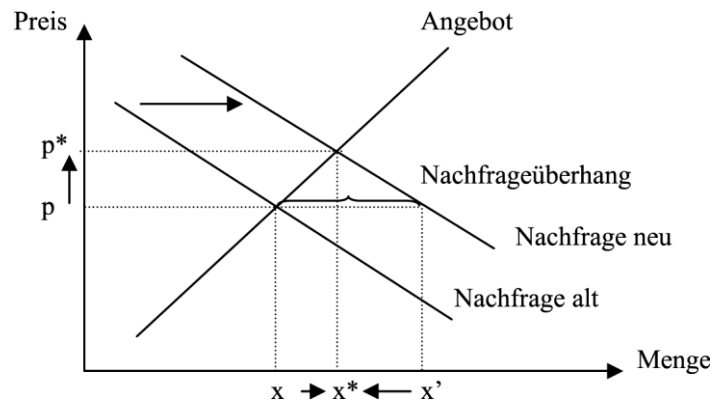

**Abbildung 1.6:** Nachfrageüberhang.

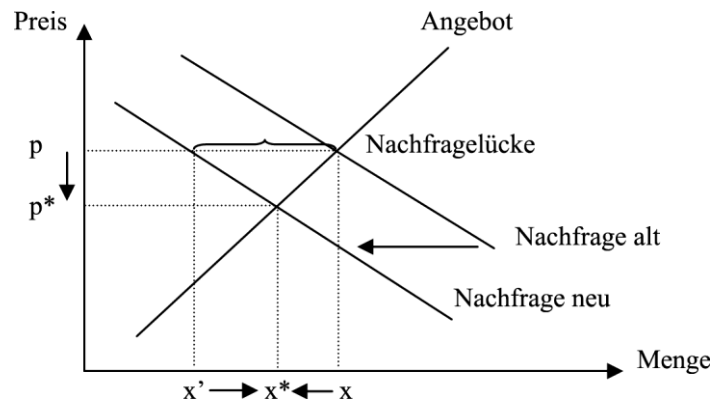

**Abbildung 1.7:** Nachfragerückgang.



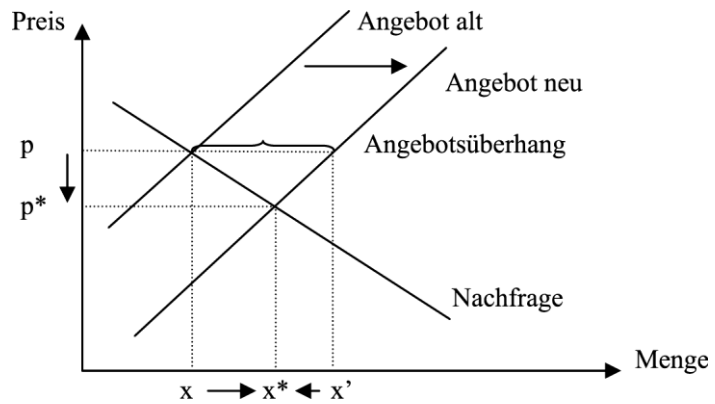

**Abbildung 1.8:** Angebotsüberhang.

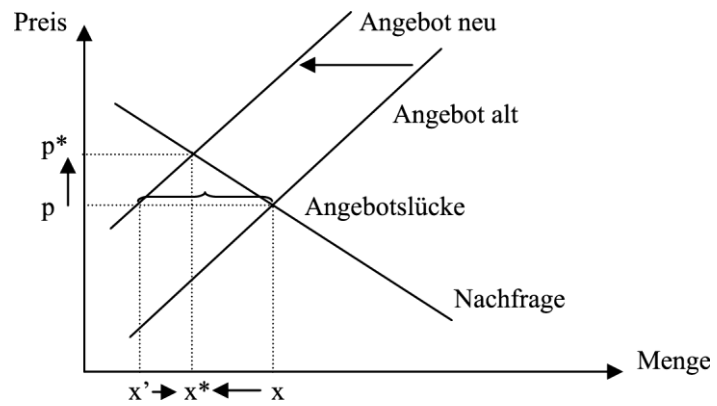

**Abbildung 1.9:** Angebotslücke.

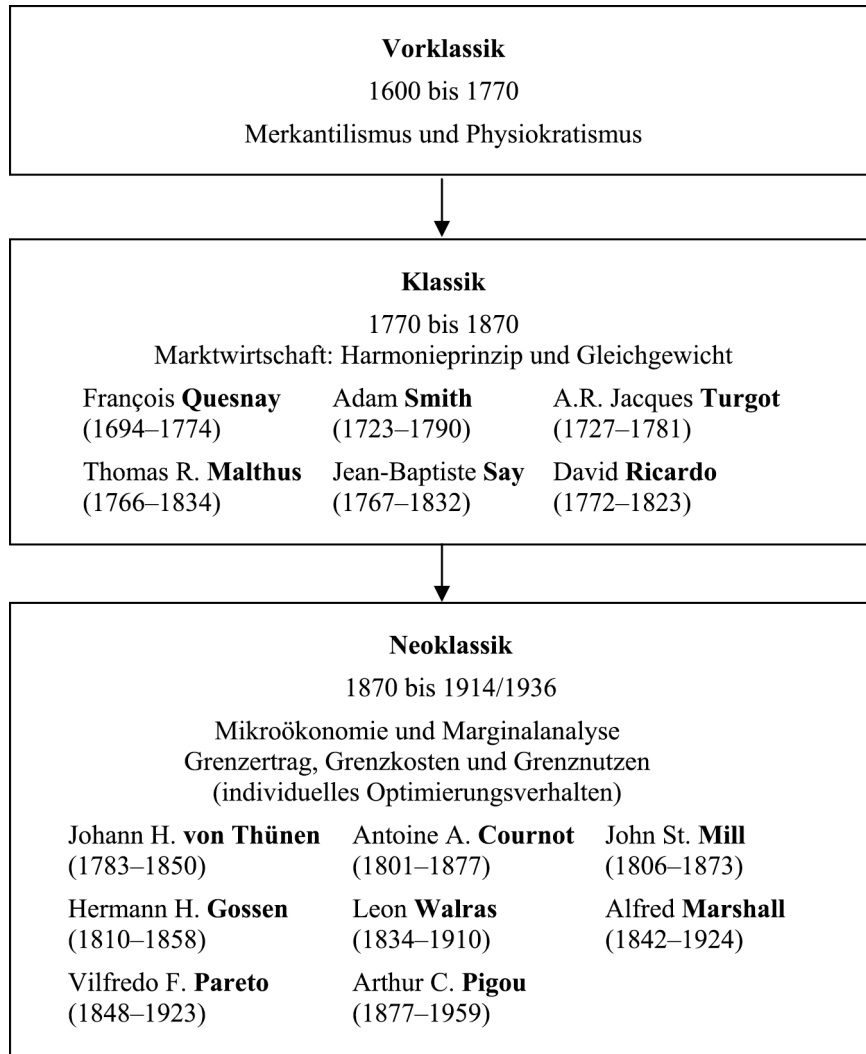

**Abbildung 1.10:** Systematik von Vorklassik, Klassik und Neoklassik.

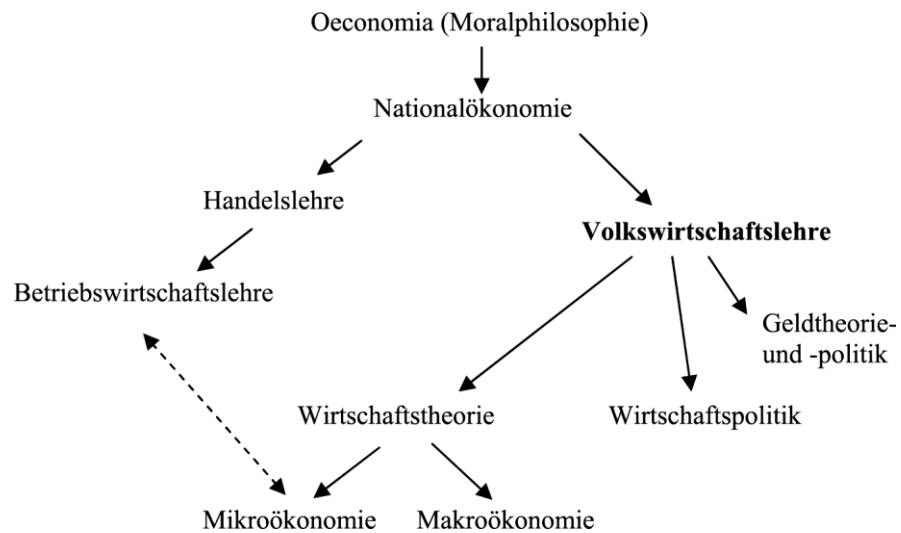

**Abbildung 1.11:** Entwicklung und Differenzierung der Volkswirtschaftslehre.

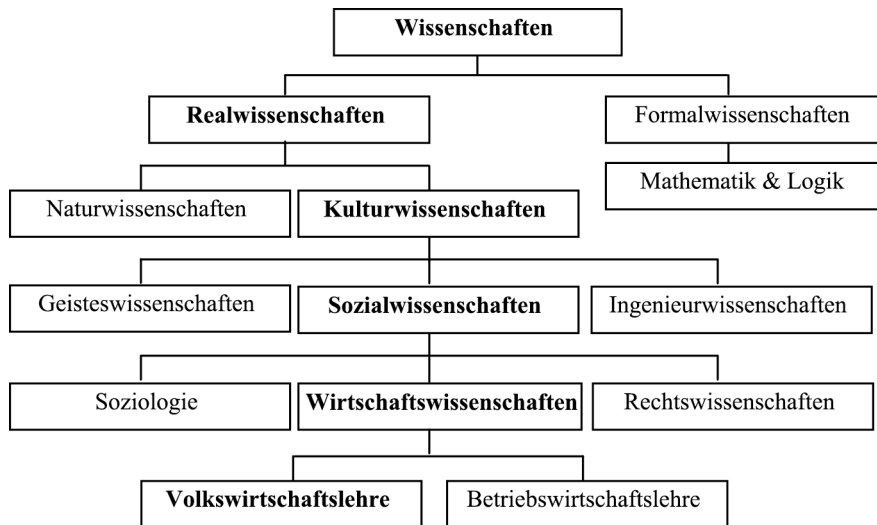

**Abbildung 1.12:** Volkswirtschaftslehre im System der Wissenschaften. [Quelle: In Anlehnung an Christiaans, Thomas: Volkswirtschaftslehre als Wissenschaft. In: WISU 8-9/2004, S. 1]

Nutzen [Nutzenpunkte]

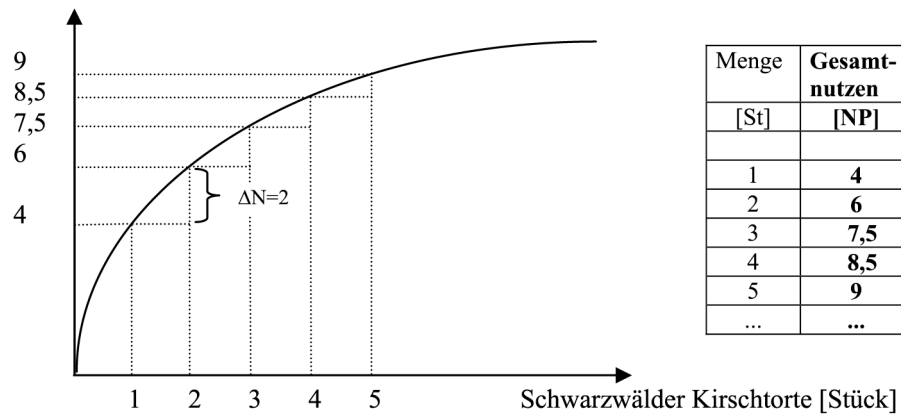

Grenznutzen [Nutzenpunkte]

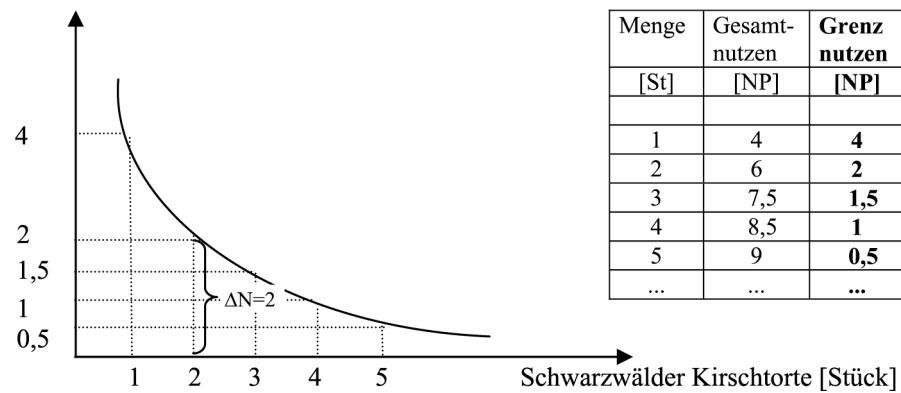

**Abbildung 1.13:** Gesamtnutzen- und Grenznutzenfunktion.

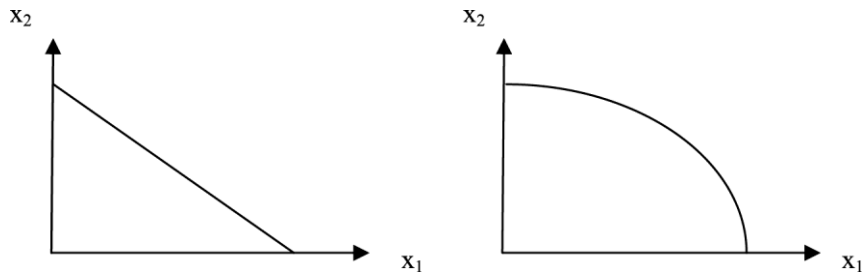

**Abbildung 1.14:** Die Transformationskurve mit linearem und ursprungskonkavem Verlauf.

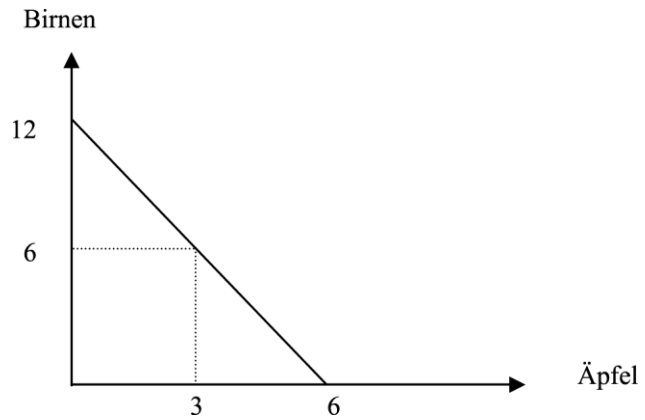

**Abbildung 1.15:** Transformationsgerade am Beispiel Apfel- und Birnenernte.



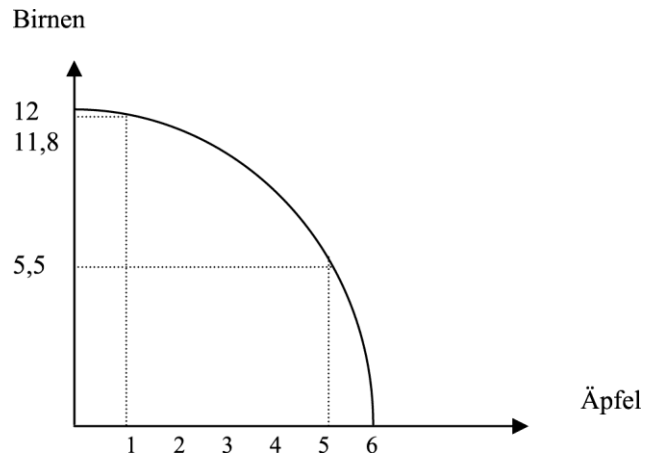

**Abbildung 1.16:** Transformationskurve am Beispiel Apfel- und Birnenernte.

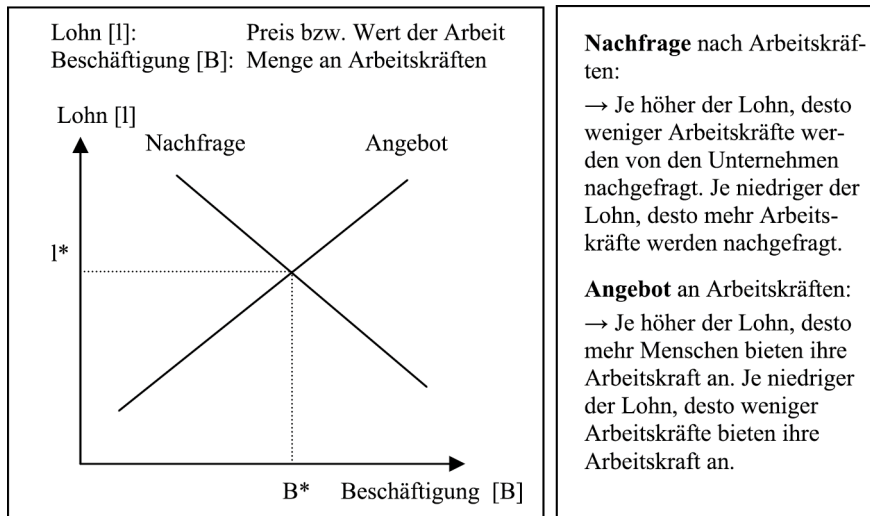

**Abbildung 1.17:** Gleichgewichtsbildung auf dem Arbeitsmarkt.

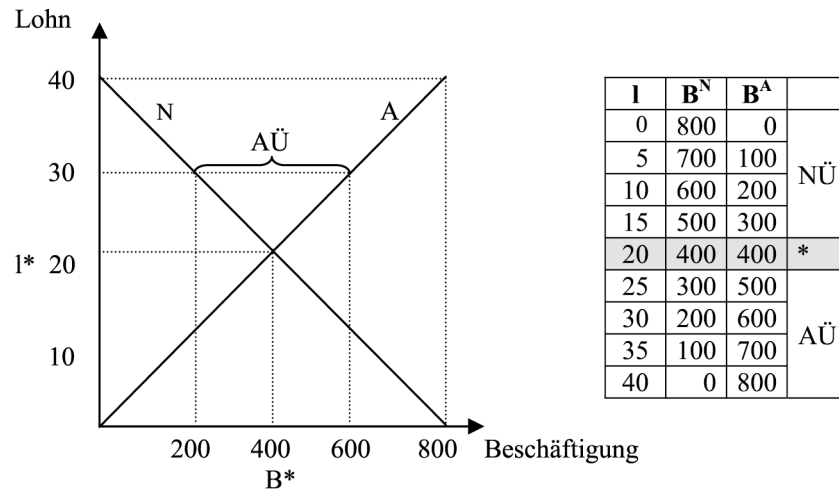

- $l$  = Lohn  
 $l^*$  = Gleichgewichts- oder Marktlohn  
 $B$  = Beschäftigung (Arbeitskräfte)  
 $B^*$  = Beschäftigungsgleichgewicht  
 $N$  = Nachfrage nach Arbeitskräften  
 $A$  = Angebot an Arbeitskraft  
 $NÜ$  = Nachfrageüberhang: Die Nachfrage nach Arbeitskräften ist höher als das Angebot an Arbeitskräften (Arbeitskräftemangel).  
 $AÜ$  = Angebotsüberhang: Das Angebot an Arbeitskräften ist höher als die Nachfrage nach Arbeitskräften (Arbeitslosigkeit). hier:  $\Delta B = \Delta B_A - \Delta B_N = 600 - 200 = 400$

**Abbildung 1.18:** Lohnbildung auf dem Arbeitsmarkt.

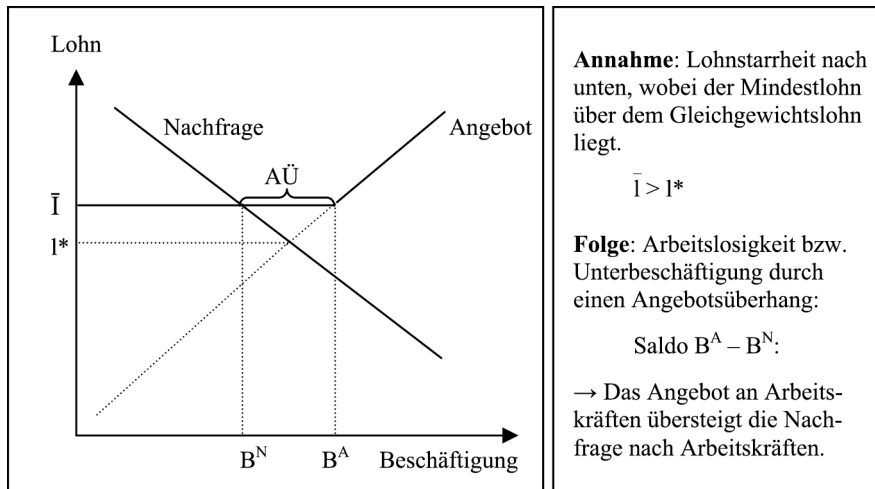

**Abbildung 1.19:** Gleichgewicht bei Unterbeschäftigung.

**klassisch angebotsorientierter Ansatz**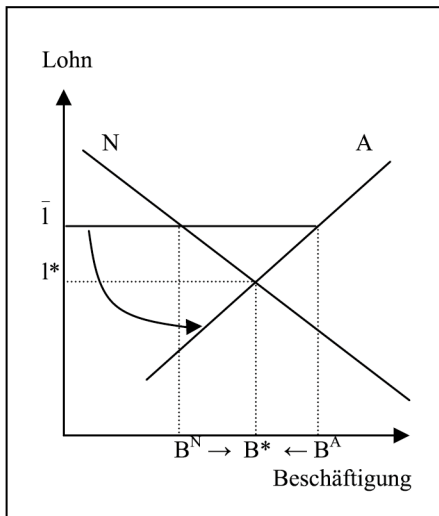

Im klassisch-angebotsorientierten Ansatz würde man die Lohnstarrheit nach unten aufheben, um so den Lohnmechanismus wirken lassen zu können. Nach einiger Zeit würde sich bei reduziertem Lohnniveau das Marktgleichgewicht bei  $I^*$  und  $B^*$  einstellen.

Grafisch bedeutet das ein „Herunterklappen“ der Angebotsfunktion bei gleichbleibender Nachfragefunktion.

**keynsianisch nachfrageorientierter Ansatz**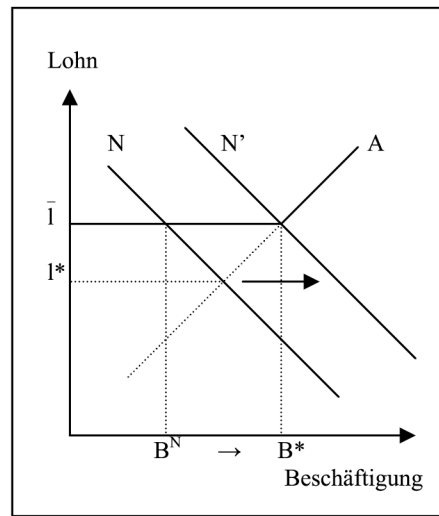

Im keynsianisch nachfrageorientierten Ansatz würde man bei gleichbleibendem Lohnniveau die Nachfrage nach Arbeitskräften erhöhen. Die Nachfrageerhöhung müßte durch den Staat (Staatsausgabenerhöhung; evtl. kreditfinanziert) erfolgen.

Grafisch bedeutet das eine Rechtsverschiebung der Nachfragefunktion bei gleichbleibender Angebotsfunktion.

**Abbildung 1.20:** Klassisch versus keynsianischer Ansatz.

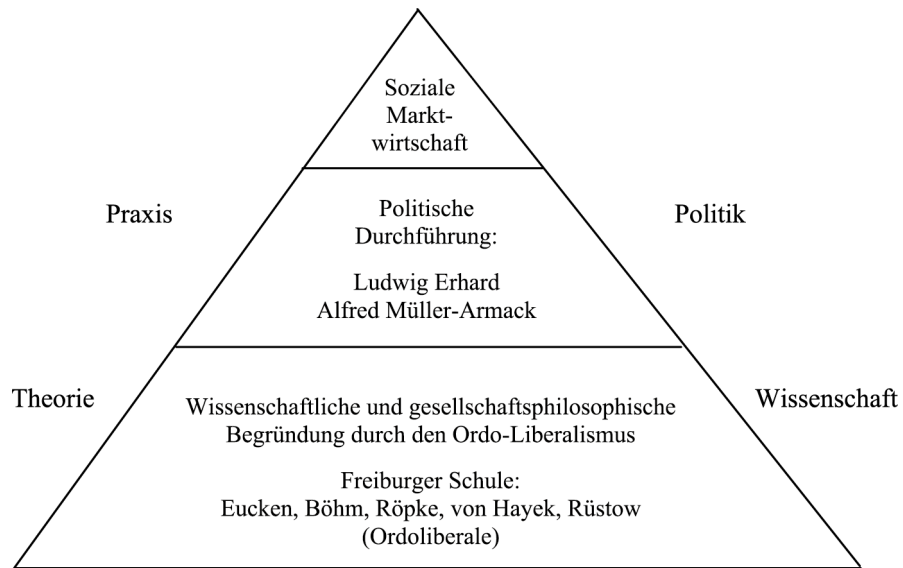

**Abbildung 1.21:** Fundament der Sozialen Marktwirtschaft.

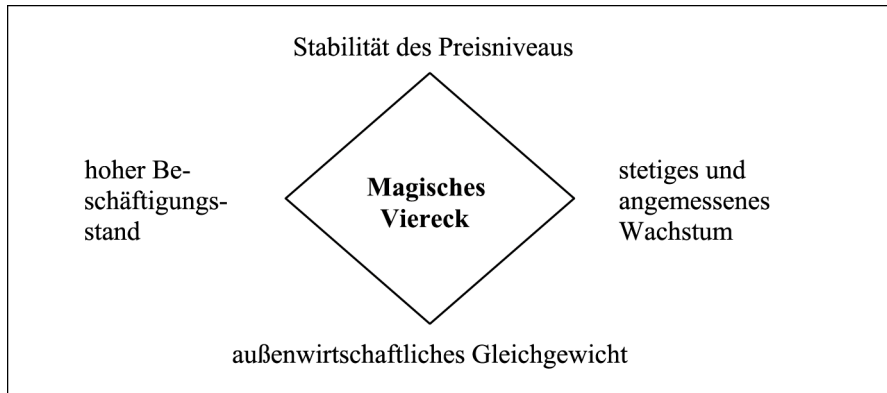

**Abbildung 1.22:** Magisches Viereck der Wirtschaftspolitik.<sup>62</sup>

<sup>62</sup> Eine ausführliche Behandlung der Themen erfolgt in Band III.

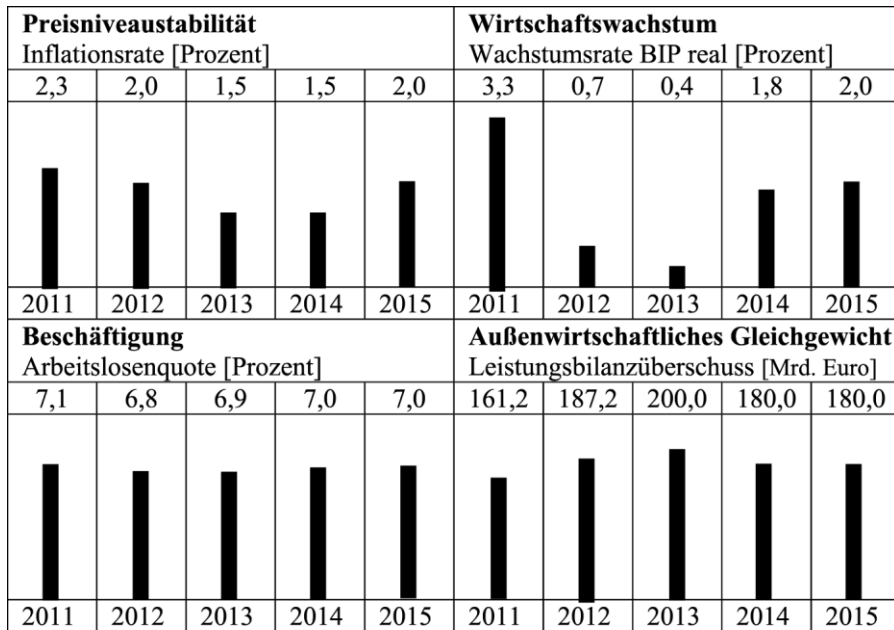

\*Die Werte für die Jahre 2013, 2014 und 2015 beruhen auf Schätzungen bzw. Prognosen!

**Abbildung 1.23:** Daten des Magischen Vierecks. [Quelle: Statistisches Bundesamt, Deutsche Bundesbank, Sachverständigenrat]



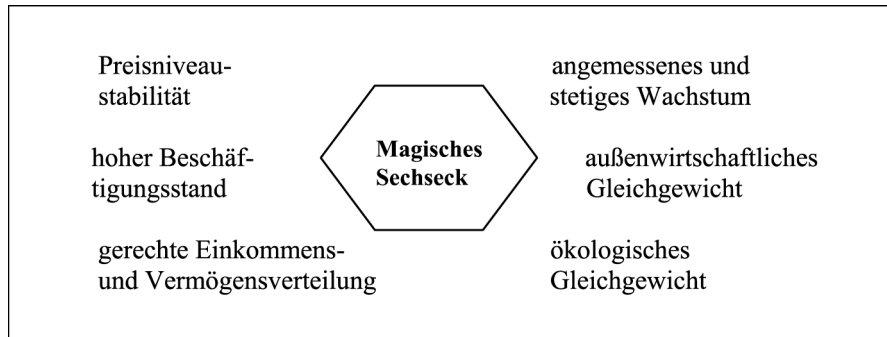

**Abbildung 1.24:** Magisches Sechseck der Wirtschaftspolitik.

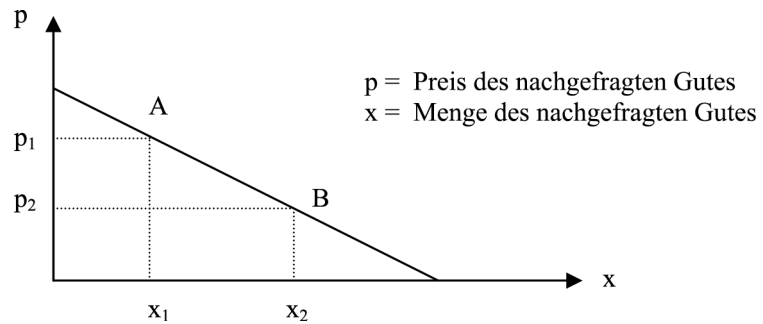

**Abbildung 2.1:** Preis-Mengen-Funktion.

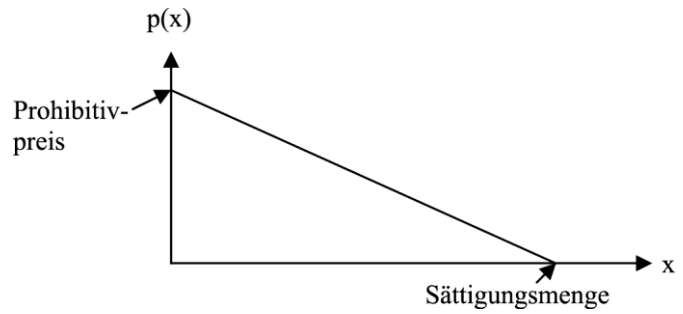

**Abbildung 2.2:** Preisabsatzfunktion.

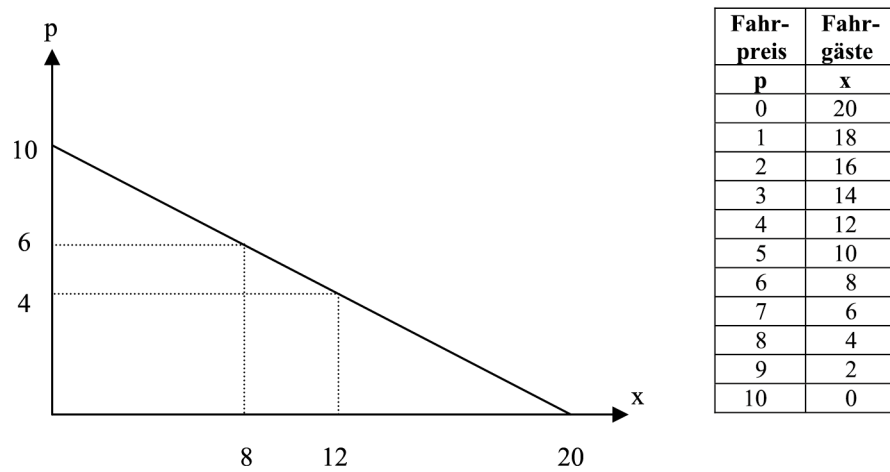

**Abbildung 2.3:** Preisabsatzfunktion am Beispiel Busfahrt.

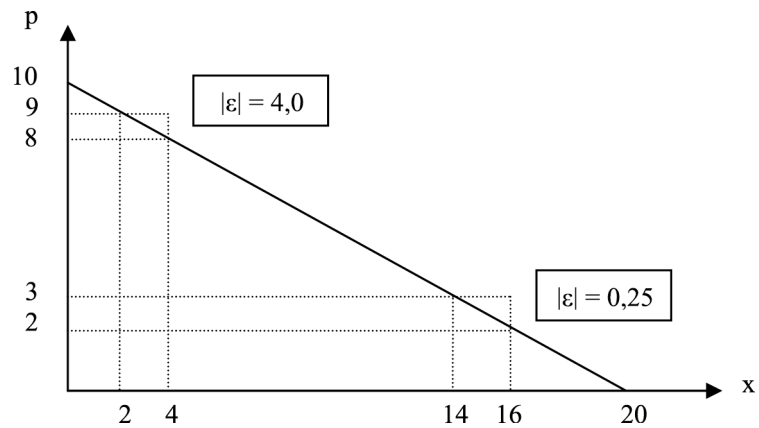

**Abbildung 2.4:** Elastizitäten am Beispiel Busfahrt.

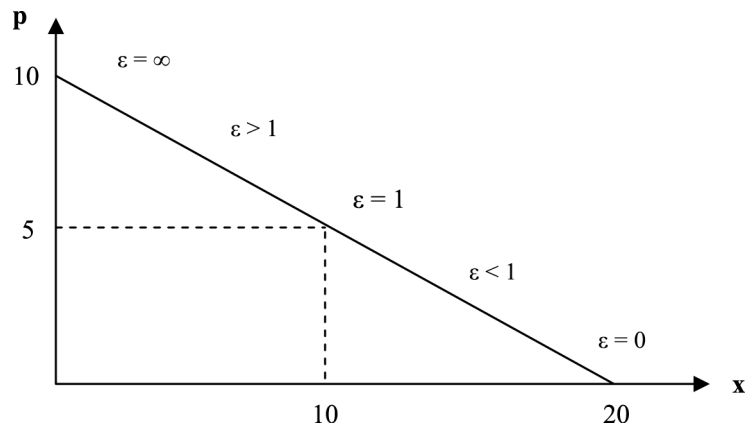

**Abbildung 2.5:** Elastizitätsbereiche ( $|\epsilon|$ )

| komplementär                                                                                       | substitutiv                                                                                                         | unverbunden                                                                                                 |
|----------------------------------------------------------------------------------------------------|---------------------------------------------------------------------------------------------------------------------|-------------------------------------------------------------------------------------------------------------|
| 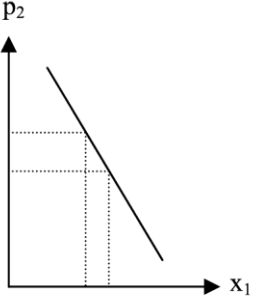                  |                                    |                           |
| <ul style="list-style-type: none"> <li>• Pfeifen und Tabak</li> <li>• CD-Player und CDs</li> </ul> | <ul style="list-style-type: none"> <li>• Margarine und Butter</li> <li>• Italienurlaub und Spanienurlaub</li> </ul> | <ul style="list-style-type: none"> <li>• Kinobesuche und Bleistifte</li> <li>• Bananen und Autos</li> </ul> |
| $\epsilon_K^K < 0$ (negativ)                                                                       | $\epsilon_K^S > 0$ (positiv)                                                                                        | $\epsilon_K^U = 0$ (null)                                                                                   |

**Abbildung 2.6:** Kreuzpreiselastizitäten bei komplementären, substitutiven und unverbundenen Gütern.

| Einkommenselastizitäten                                                           |                                                                                   |                    |                                                                                   |
|-----------------------------------------------------------------------------------|-----------------------------------------------------------------------------------|--------------------|-----------------------------------------------------------------------------------|
| superiore Güter                                                                   | inferiore Güter                                                                   |                    | einkommensunabhängige Güter                                                       |
| 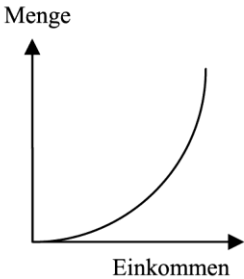 |  |                    |  |
| Diamanten                                                                         | Brot*                                                                             | Sozialwohnungen    | Medikamente                                                                       |
| überproportionale bzw. progressive Zunahme                                        | unterproportionale (degressive) Zunahme                                           | absoluter Rückgang | unabhängig                                                                        |
| $\epsilon_E > 1$                                                                  | $0 < \epsilon_E < 1$                                                              | $\epsilon_E < 0$   | $\epsilon_E = 0$                                                                  |

**Abbildung 2.7:** Superiore, inferiore und einkommensunabhängige Güter.



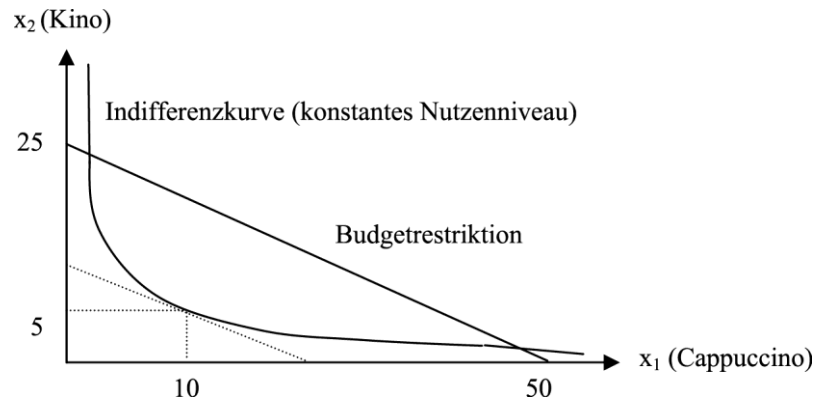

**Abbildung 2.8:** Indifferenzkurve und Budgetrestriktion.

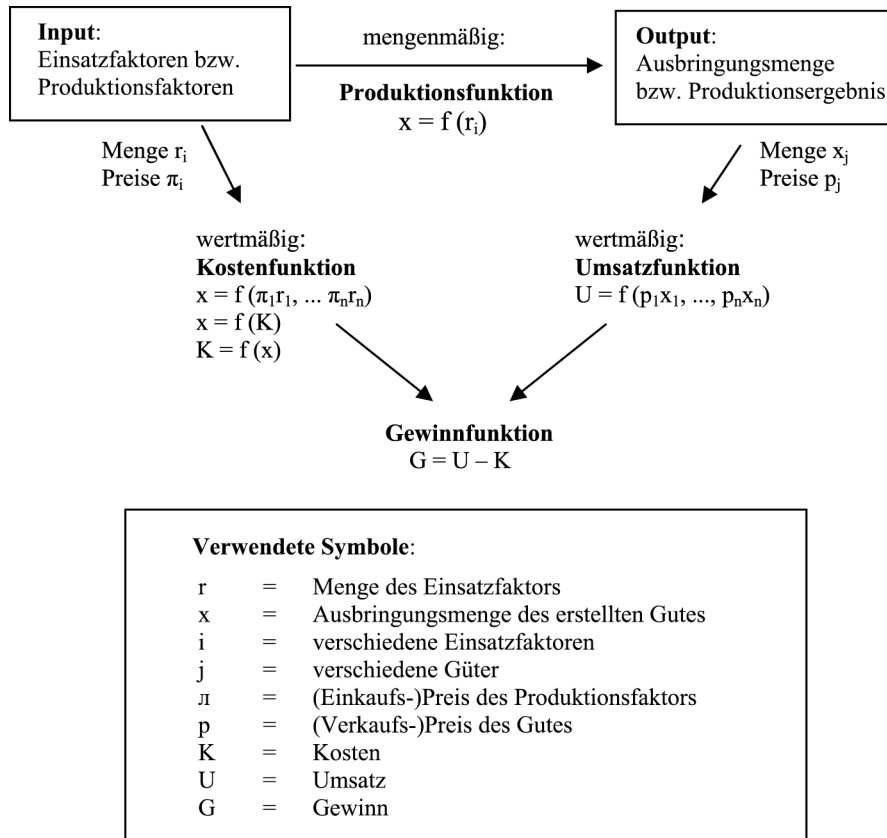

**Abbildung 2.9:** Zusammenhang von Kosten, Umsatz und Gewinn.

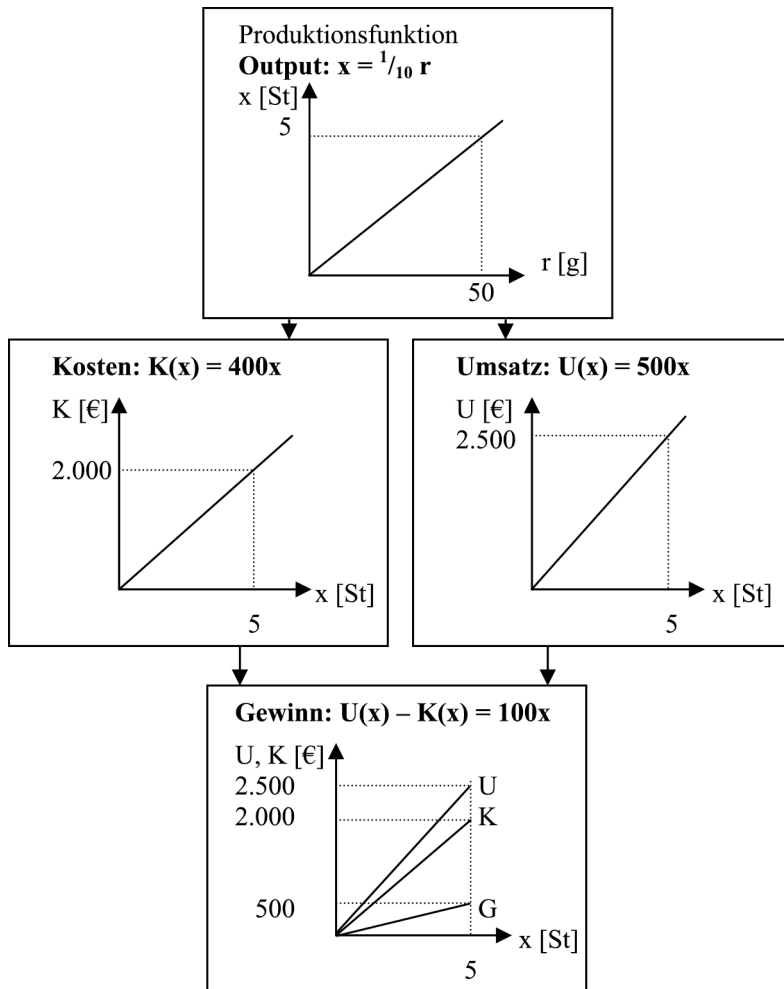

**Abbildung 2.10:** Produktion, Kosten, Umsatz und Gewinn am Beispiel Fingerring.

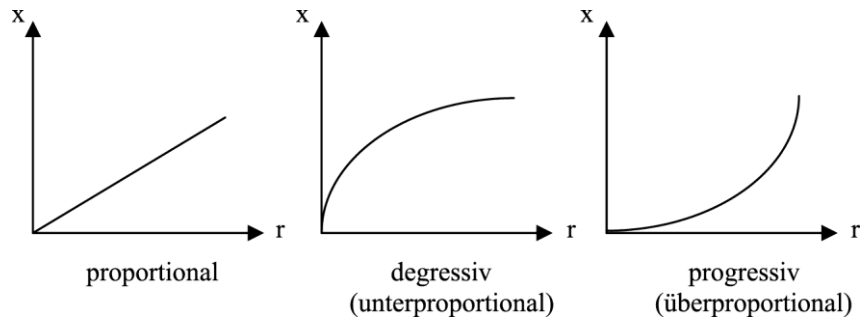

**Abbildung 2.11:** Varianten von Input-Output-Beziehungen.

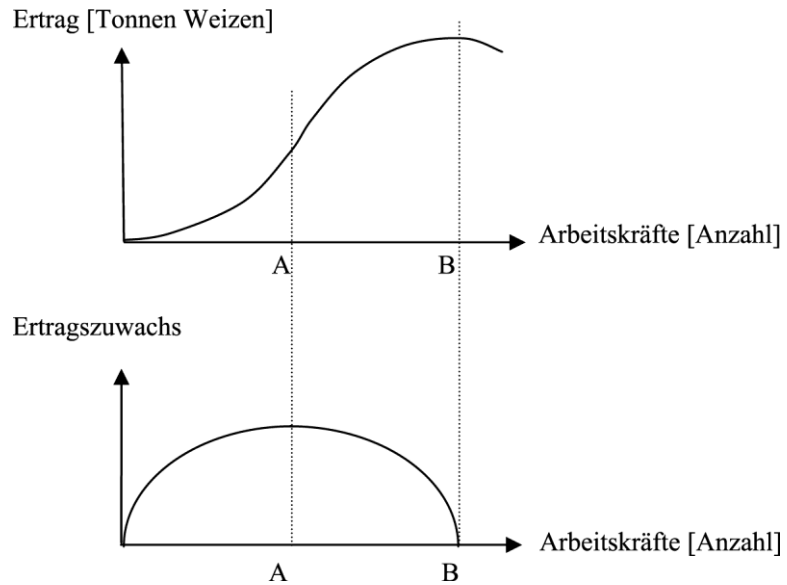

**Abbildung 2.12:** Produktionsfunktion vom Typ A.

Beispiel:

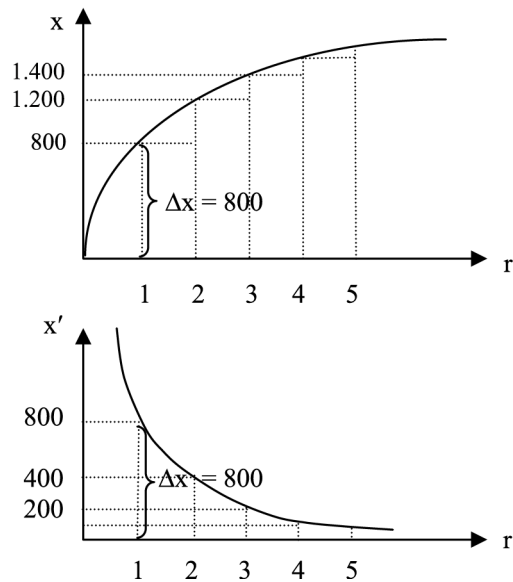

| Zeit | Ertrag | Ertrags-<br>zuwachs |
|------|--------|---------------------|
| $r$  | $x$    | $x'$                |
| 1    | 800    | 800                 |
| 2    | 1.200  | 400                 |
| 3    | 1.400  | 200                 |
| 4    | 1.500  | 100                 |
| 5    | 1.550  | 50                  |
| ...  | ...    | ...                 |

Erläuterung: Der Grenzertrag entspricht den Differenzbeträgen des Gesamtertrages, wenn der Input um eine Einheit erhöht wird.

Abbildung 2.13: Neoklassische Produktionsfunktion.

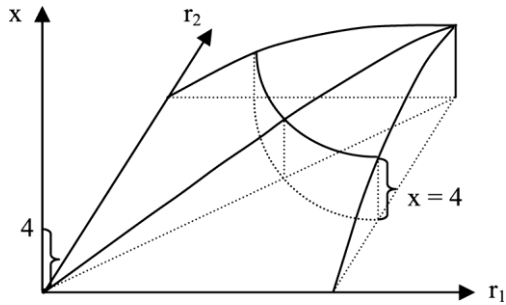

**Abbildung 2.14:** Ertragsgebirge einer neoklassischen Produktionsfunktion.

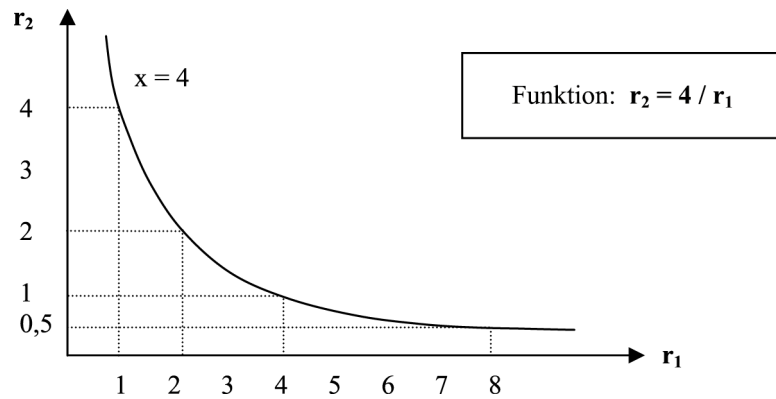

**Abbildung 2.15:** Indifferenzkurve.



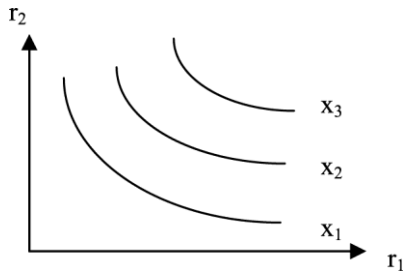

**Abbildung 2.16:** Indifferenzkurven unterschiedlichen Ertragsniveaus.

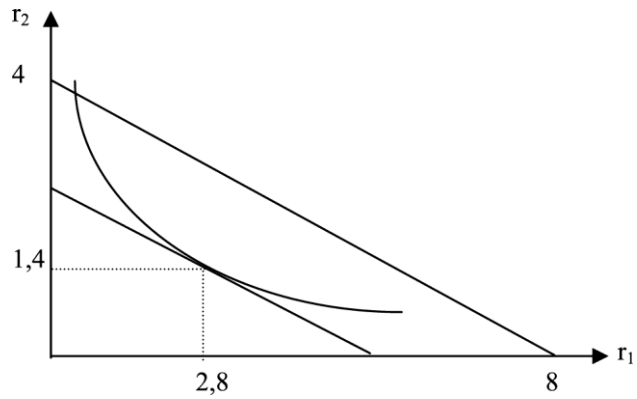

**Abbildung 2.17:** Minimalkostenkombination.

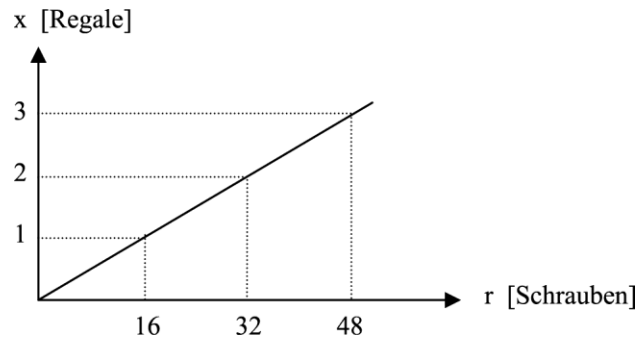

**Abbildung 2.18:** Linear-limitationales Einsatzverhältnis am Beispiel Regalbau.

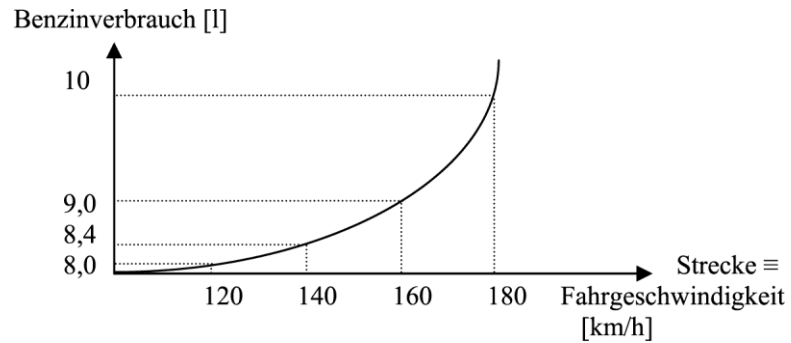

**Abbildung 2.19:** Allgemein-limitationale Produktionsfunktion.

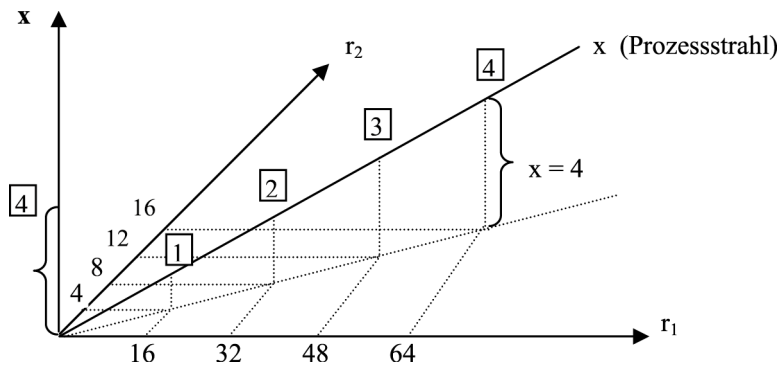

**Abbildung 2.20:** Limitationale Produktionsfunktion.

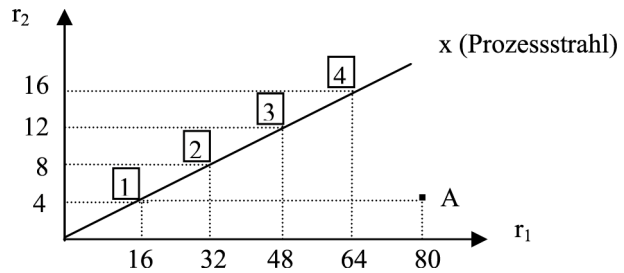

Abbildung 2.21: Prozessstrahl.

**Produktionsfunktion:**

$$x = f(r)$$

$$x = \frac{1}{10} r$$

**Kostenfunktion:**

$$K = f(x)$$

Herleitung:

$$K = \pi r$$

$$K = 2 r \text{ und}$$

$$r = 10x \text{ (aus } x = \frac{1}{10} r \text{)}$$

$$\rightarrow K = 20x$$

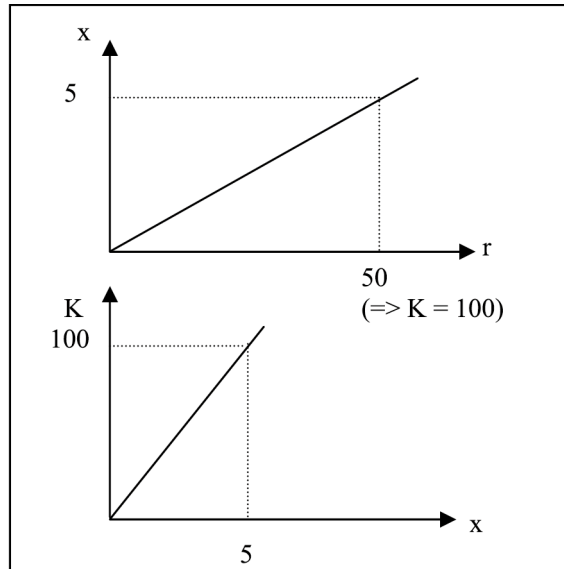

**Abbildung 2.22:** Von der Produktionsfunktion zur Kostenfunktion.

| Einsatz-<br>faktor | Ausbrin-<br>gungs-<br>menge | Kosten des<br>Faktorein-<br>satzes |
|--------------------|-----------------------------|------------------------------------|
| Arbeitszeit        | Pizzen                      | Lohnkosten                         |
| $r$ [h]            | $x$ [St]                    | $K$ [€] = $\pi r$                  |
|                    |                             |                                    |
| 1                  | 0                           | 60                                 |
| 2                  | 0                           | 120                                |
| 3                  | 5                           | 180                                |
| 4                  | 10                          | 240                                |
| 5                  | 15                          | 300                                |
|                    |                             |                                    |

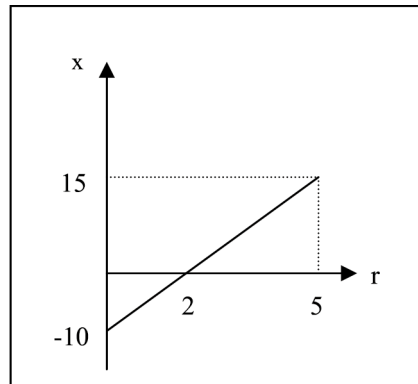

#### Produktionsfunktion

$$x = f(r)$$

$$x = -10 + 5r$$

#### Kostenfunktion

$$K = f(x)$$

Herleitung:

$$K = 60r \text{ und } r = \frac{1}{5}x + 2$$

$$\Rightarrow K = 120 + 12x *$$

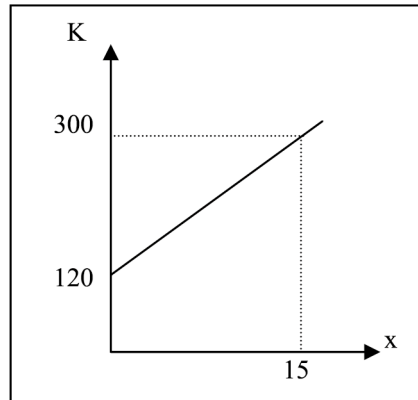

\* Hinweis: 120 Euro sind Fixkosten (z. B. Miet- oder Rüstkosten), die auch dann anfallen, wenn nichts produziert ( $x = 0$ ) wird.

**Abbildung 2.23:** Produktions- und Kostenfunktion.



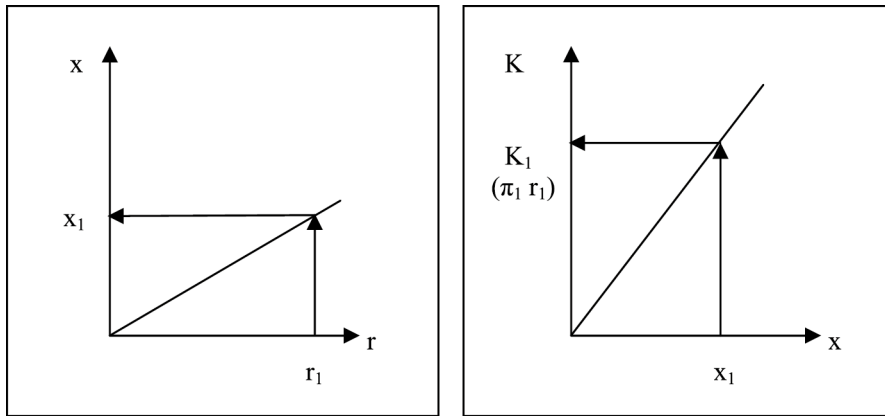

**Abbildung 2.24:** Herleitung der Kostenfunktion aus der Produktionsfunktion.

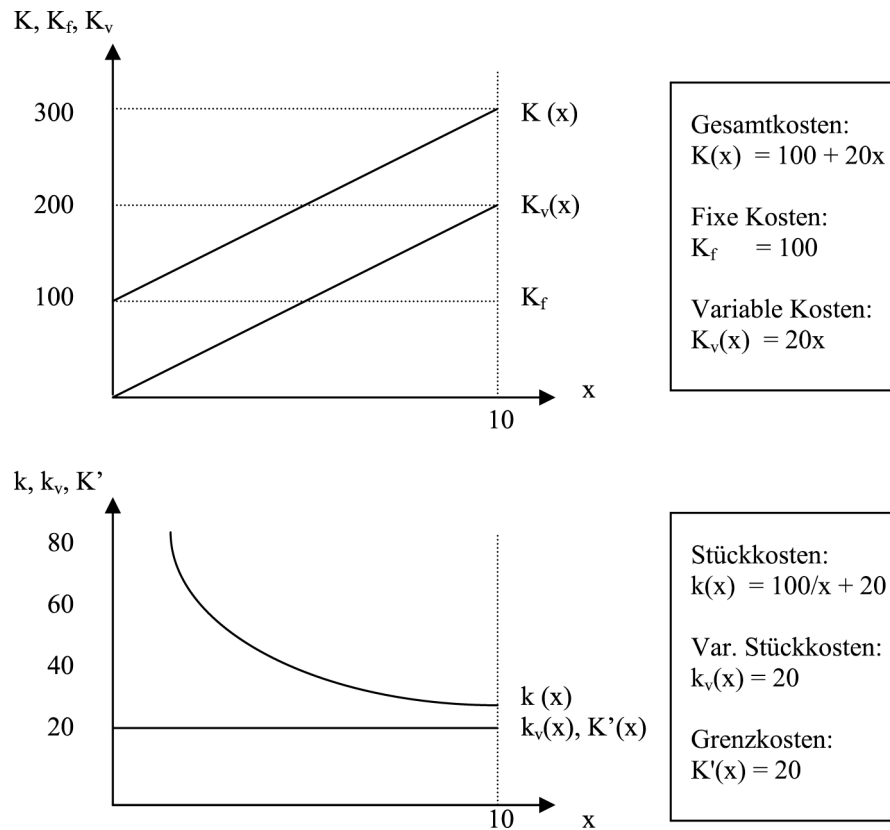

**Abbildung 2.25:** Kostenfunktionen.

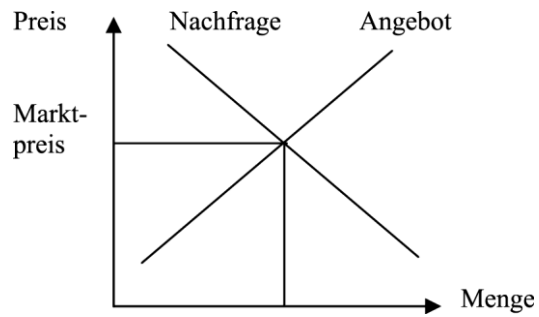

**Abbildung 2.26:** Preisbildung auf dem Markt.

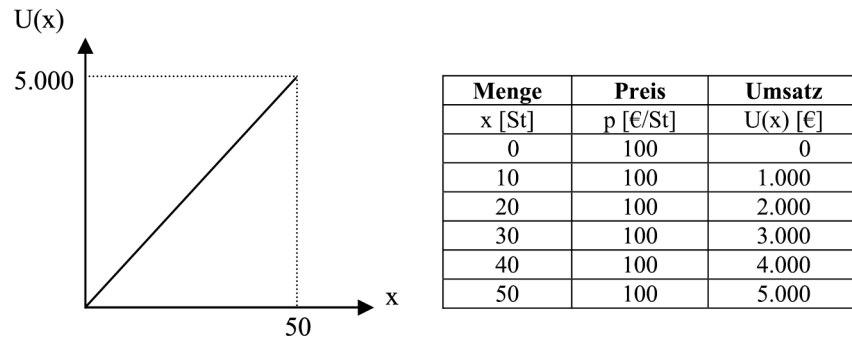

**Abbildung 2.27:** Umsatzfunktion.

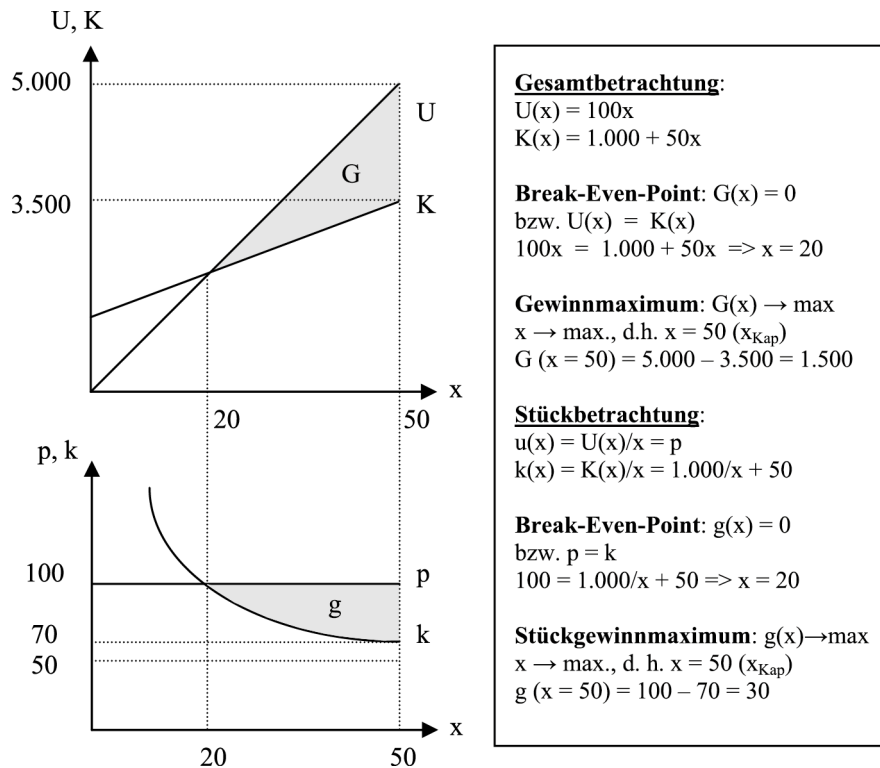

Abbildung 2.28: Gewinnmaximierung im Polypol.

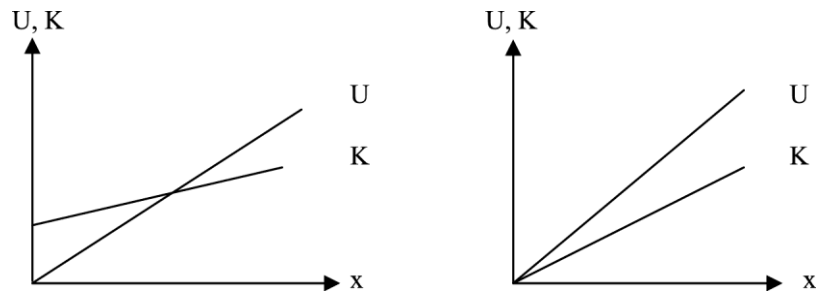

**Abbildung 2.29:** Umsatz- und Kostenfunktion im Polypol.

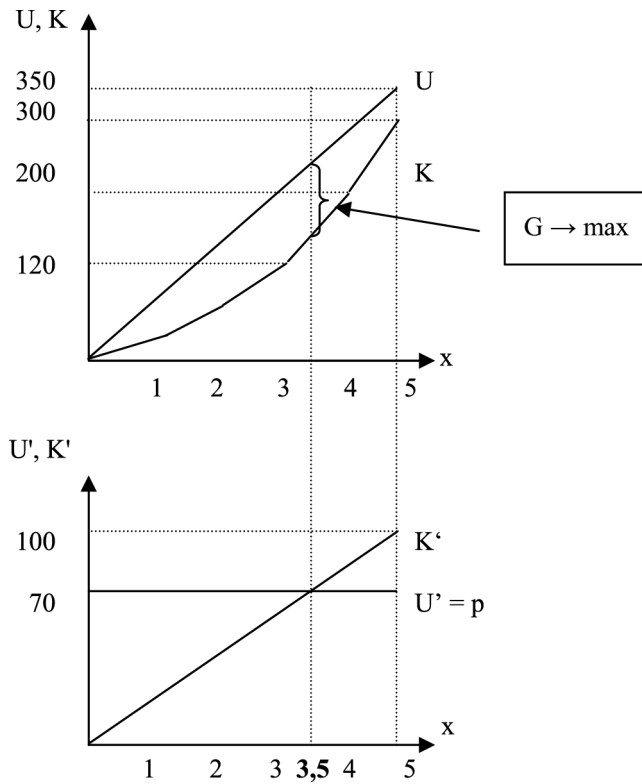

**Abbildung 2.30:** Gewinnmaximierung im Polypol (nicht-lineare Kostenfunktion).

Die Preisabsatzfunktion lautet:  $p(x) = 10 - \frac{1}{2}x$

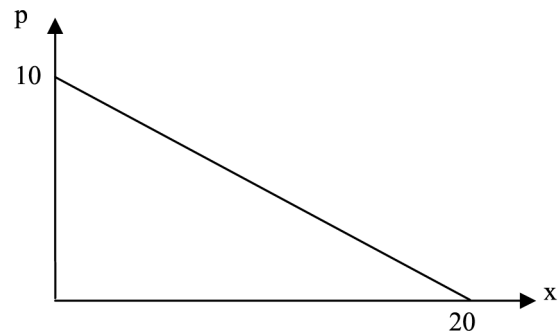

| Preis | Menge |
|-------|-------|
| $p$   | $x$   |
| 10    | 0     |
| 9     | 2     |
| 8     | 4     |
| 7     | 6     |
| 6     | 8     |
| 5     | 10    |
| 4     | 12    |
| 3     | 14    |
| 2     | 16    |
| 1     | 18    |
| 0     | 20    |

**Abbildung 2.31:** Preisabsatzfunktion.



Umsatz:  $U(x) = p(x) \cdot x$

**Pizzabeispiel:**

**Preisabsatzfunktion:**

$$p(x) = 10 - \frac{1}{2}x$$

**Umsatzfunktion:**

$$U(x) = p(x) \cdot x$$

$$U(x) = (10 - \frac{1}{2}x) \cdot x$$

$$U(x) = 10x - \frac{1}{2}x^2$$

| Preis<br>$p(x)$ | Menge<br>$x$ | Umsatz<br>$U(x)$ |
|-----------------|--------------|------------------|
| 10              | 0            | 0                |
| 9               | 2            | 18               |
| 8               | 4            | 32               |
| 7               | 6            | 42               |
| 6               | 8            | 48               |
| 5               | 10           | 50               |
| 4               | 12           | 48               |
| 3               | 14           | 42               |
| 2               | 16           | 32               |
| 1               | 18           | 18               |
| 0               | 20           | 0                |

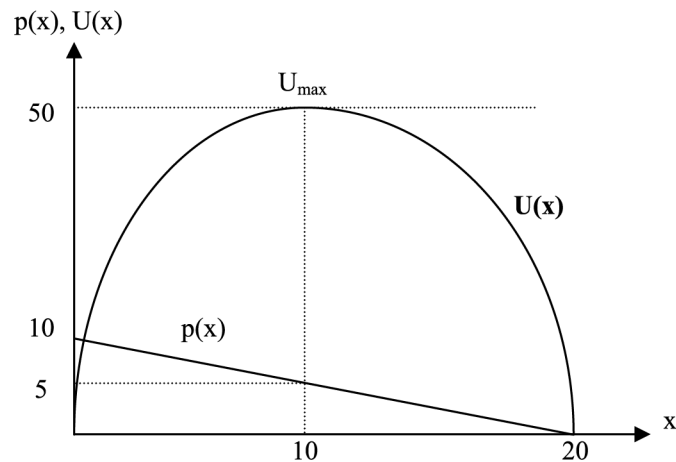

**Abbildung 2.32:** Umsatzmaximierung im Monopol.

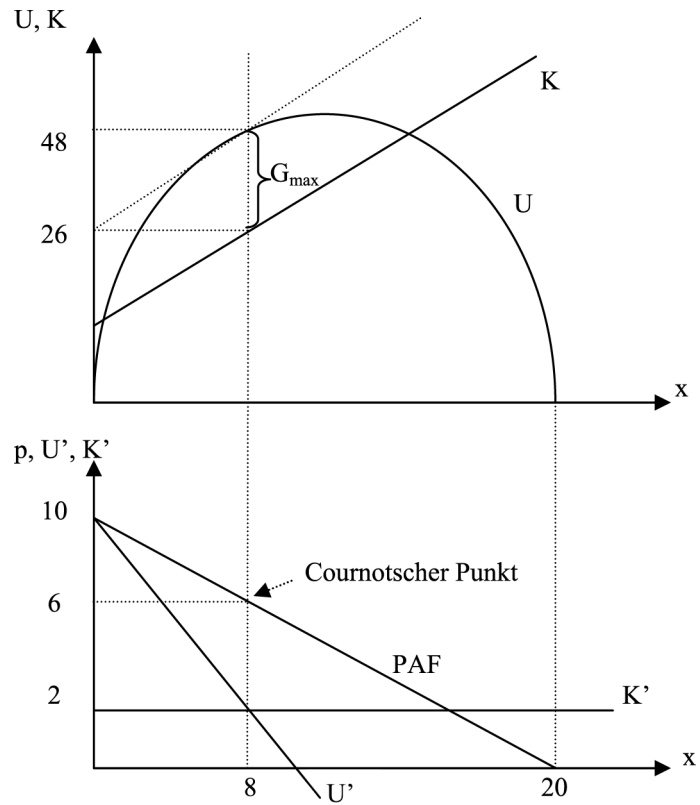

**Abbildung 2.33:** Gewinnmaximierung im Monopol.

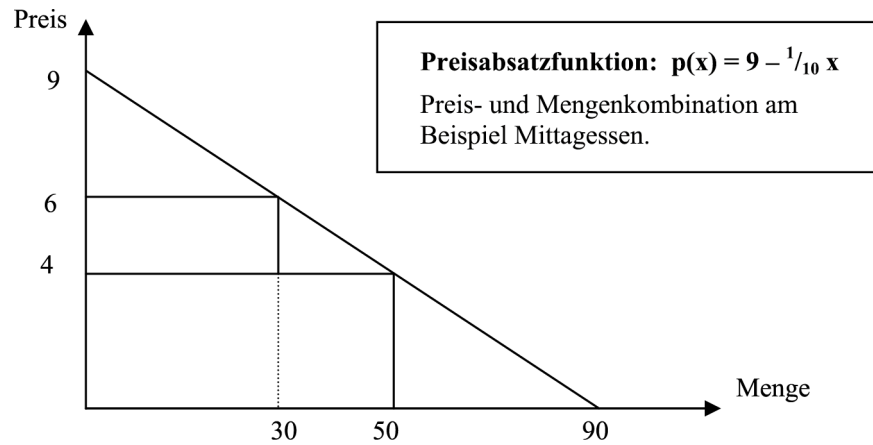

**Abbildung 2.34:** Preisabsatzfunktion und Preisdifferenzierung.

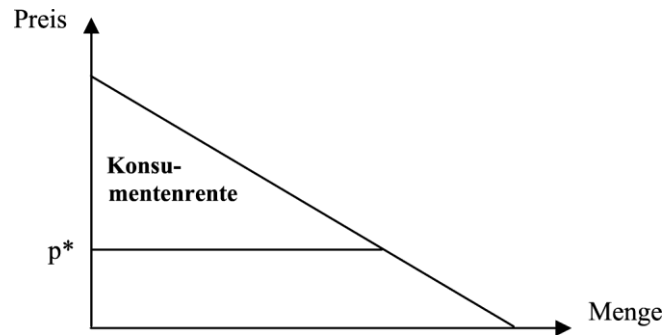

**Abbildung 2.35:** Konsumentenrente.

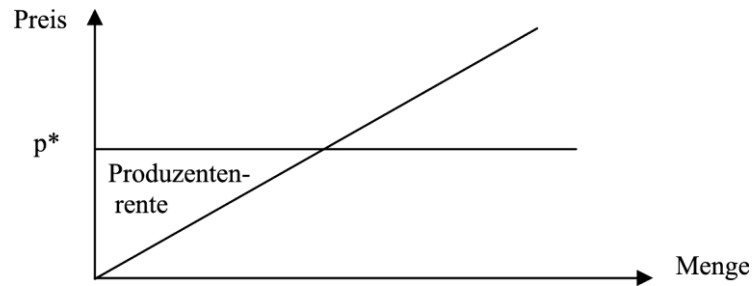

**Abbildung 2.36:** Produzentenrente.

| Die größten Unternehmen der Welt | Umsatz im Jahr 2012 in Milliarden Dollar |
|----------------------------------|------------------------------------------|
| Royal Dutch Shell (NL/GB)        | 482                                      |
| Wal-Mart Stores (USA)            | 469                                      |
| Exxon Mobil (USA)                | 450                                      |
| Sinopec Group (China)            | 428                                      |
| China National Petroleum (China) | 409                                      |
| BP (GB)                          | 388                                      |
| State Grid (China)               | 298                                      |
| Toyota Motor (J)                 | 266                                      |
| Volkswagen (D)                   | 248                                      |
| Total (F)                        | 234                                      |
| Chevron (USA)                    | 234                                      |
| Glencore Xstrata (USA)           | 214                                      |
| Japan Post Holding (J)           | 191                                      |
| Samsung Electronics (Südkorea)   | 179                                      |
| E.ON (D)                         | 170                                      |
| Phillips 66 (NL)                 | 170                                      |
| ENI (I)                          | 168                                      |
| Berkshire Hathaway (USA)         | 163                                      |
| Apple (USA)                      | 157                                      |
| AXA (F)                          | 155                                      |

**Abbildung 2.37:** Die größten Unternehmen der Welt. [Quelle: Fortune Global 500, Biggest Companies 2013]

| Die größten Arbeitgeber der Welt         | Beschäftigte im Jahr 2011 [in Tausend] |
|------------------------------------------|----------------------------------------|
| Wal-Mart Stores (USA)                    | 2.200                                  |
| China National Petroleum (China)         | 1.668                                  |
| State Grid (China)                       | 1.583                                  |
| Sinoproc Group (China)                   | 1.022                                  |
| Hon Hai Precision Industry (Taiwan)      | 961                                    |
| China Post Group (China)                 | 889                                    |
| U.S. Postal Service (USA)                | 602                                    |
| Volkswagen (D)                           | 502                                    |
| China Telecommunications (China)         | 491                                    |
| Aviation Industry Group of China (China) | 480                                    |
| Compass Group (GB)                       | 471                                    |
| Agricultural Bank of China (China)       | 447                                    |
| International Business Machines (USA)    | 433                                    |
| Deutsche Post (D)                        | 424                                    |
| McDonald's (USA)                         | 420                                    |
| Carrefour (F)                            | 412                                    |
| Industrial & Commercial Bank of China    | 409                                    |
| Tesco (GB)                               | 406                                    |
| Gazprom (Russland)                       | 401                                    |
| Sodexo (F)                               | 391                                    |

**Abbildung 2.38:** Die größten Arbeitgeber der Welt. [Quelle: CNN Money, Global 500, Biggest Employees 2012]

| Die größten deutschen Unternehmen<br>(ohne Banken und Versicherungen) | Umsatz im Jahr 2013 in Milliarden Euro (gerundet) |
|-----------------------------------------------------------------------|---------------------------------------------------|
| Volkswagen (Automobil)                                                | 193                                               |
| E.ON (Energie)                                                        | 132                                               |
| Daimler (Automobil)                                                   | 114                                               |
| BASF (Chemie)                                                         | 79                                                |
| Siemens (Technologie)                                                 | 78                                                |
| BMW (Automobil)                                                       | 77                                                |
| Schwarz (Handel)                                                      | 68                                                |
| Metro (Handel)                                                        | 67                                                |
| Deutsche Telekom                                                      | 58                                                |
| Aldi (Handel)                                                         | 57                                                |
| Deutsche Post (Logistik)                                              | 56                                                |
| BP Europa (Mineralöl)                                                 | 55                                                |
| Bosch (Technologie)                                                   | 52                                                |
| RWE (Energie)                                                         | 51                                                |
| Rewe (Handel) / Audi (Automobil)                                      | 49                                                |
| Edeka (Handel)                                                        | 45                                                |
| ThyssenKrupp (Rohstoffe)                                              | 40                                                |
| Bayer (Chemie)                                                        | 40                                                |
| Deutsche Bahn (Mobilität, Logistik)                                   | 39                                                |
| Continental (Technologie)                                             | 33                                                |

**Abbildung 2.39:** Die größten deutschen Unternehmen nach Umsatz. [Quelle: faz.net: Wirtschaft/Unternehmen, 03.07.2013]



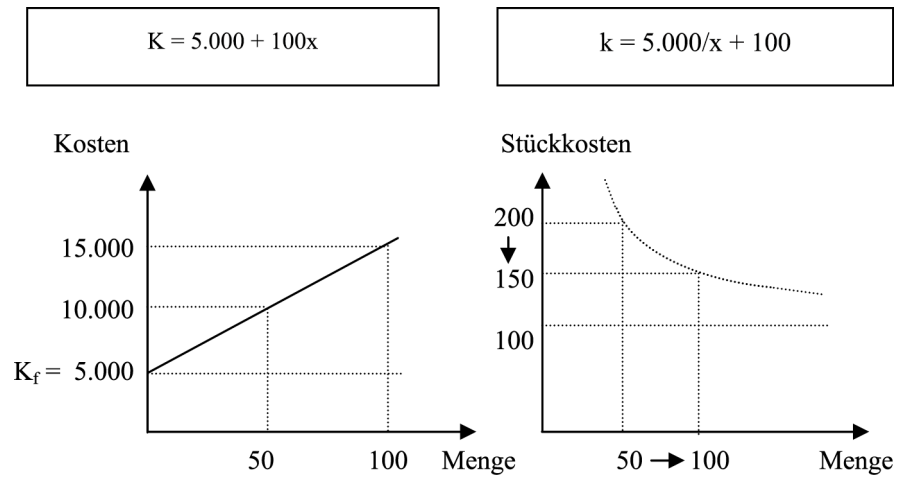

**Abbildung 2.40:** Gesamtkosten und abnehmender Stückkostenverlauf.

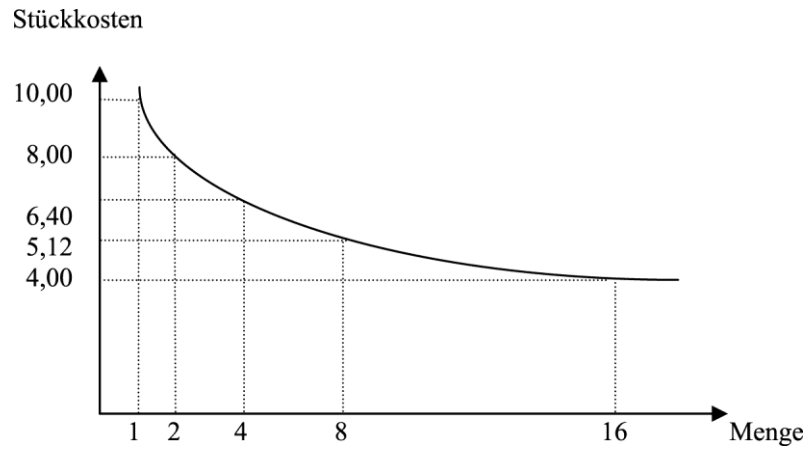

**Abbildung 2.41:** Erfahrungskurve.<sup>80</sup>

<sup>80</sup> Stellt man die Erfahrungskurve logarithmisch dar, ergibt sich eine lineare Funktion.

**Abbildung 2.42:** Fusionskontrolle [Quelle: Schmidt/Haucap: Wettbewerbspolitik und Kartellrecht, Oldenbourg, München 2013, S. 223]

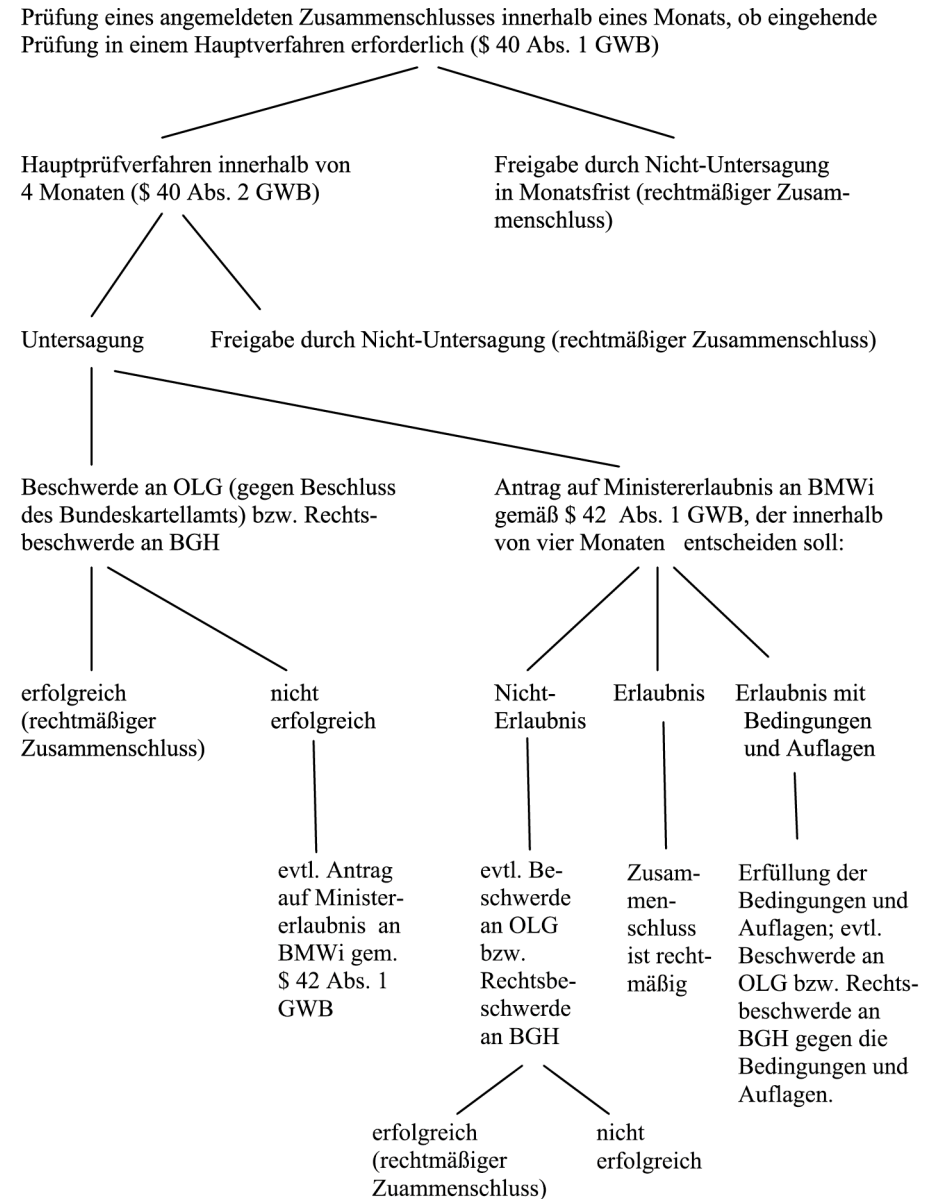

Supplement: Supplementary file 1 [file 9783110376265_List-of-Figures-and-Tables.pdf]
